1  
2  
3  
4  
5  
6  
7  
8  
9  
10  
11  
12  
13  
14  
15  
16  
17  
18  
19  
20  
21  
22  
23  
24  
25

**Title: Mitochondrial introgression suggests extensive ancestral hybridization events among *Saccharomyces* species**

Authors: David Peris<sup>1,†</sup>, Armando Arias<sup>1,‡</sup>, Sandi Orlić<sup>1,§</sup>, Carmela Belloch<sup>2</sup>, Laura Pérez-Través<sup>2</sup>, Amparo Querol<sup>2</sup>, Eladio Barrio<sup>1,2,3</sup>

<sup>1</sup> "Cavanilles" Institute of Biodiversity and Evolution, University of Valencia, Valencia, Spain.

<sup>2</sup> Department of Food Biotechnology. Institute of Agrochemistry and Food Technology (IATA), CSIC, Valencia, Spain.

<sup>3</sup> Department of Genetics, University of Valencia, Valencia, Spain.

Present addresses:

<sup>†</sup> Laboratory of Genetics, DOE Great Lakes Bioenergy Research Center, University of Wisconsin-Madison, Madison, WI 53706, USA.

<sup>‡</sup> Biotechnology Laboratory, Botany and Zoology Department, CUCBA, University of Guadalajara, Zapopan, Jalisco, Mexico.

<sup>§</sup> Institute Ruđer Bošković, Zagreb, Croatia.

\*Corresponding author:

David Peris Navarro

E-mail: [david.perisnavarro@wisc.edu](mailto:david.perisnavarro@wisc.edu)

26 **Abstract** (250 words)

27

28 Horizontal Gene Transfer (HGT) in eukaryotic plastids and mitochondrial genomes is  
29 frequently observed, and plays an important role in organism evolution. In yeasts, recent  
30 mitochondrial HGT has been suggested between *S. cerevisiae* and *S. paradoxus*.  
31 However, few strains have been explored due to the lack of accurate mitochondrial  
32 genome annotations. Mitochondrial genome sequences are important to understand how  
33 frequent these introgressions occur and their role in cytonuclear incompatibilities. In fact,  
34 most of the Bateson-Dobzhansky-Muller genetic incompatibilities described in yeasts are  
35 driven by these cytonuclear incompatibilities. In this study, we have explored the  
36 mitochondrial inheritance of several worldwide distributed *Saccharomyces* species  
37 isolated from different sources and geographic origins. We demonstrated the existence  
38 of recombination hotspots in the mitochondrial region *COX2-ORF1*, likely mediated by  
39 the transfer of two different types of *ORF1*, encoding a free-standing homing  
40 endonuclease, or facilitated by AT tandem repeats and GC clusters. These introgressions  
41 were shown to occur both at intra- and interspecific levels. Based on our results we  
42 proposed a model which involve several ancestral hybridization events among  
43 *Saccharomyces* strains in wild environments.

44

45 *Keywords:* *Saccharomyces*, reticulate evolution, mitochondrial introgression, selfish  
46 elements, recombination, interspecies hybridization.

47

## 48 Introduction

49 Chloroplast and mitochondrial genomes are prone to introgressions and Horizontal  
50 Gene Transfers (HGT) (Keeling 2009; Hao et al. 2010), which likely play an important role  
51 in the evolution of eukaryotes (Andersson 2009). Mitochondria are involved in multiple  
52 cellular processes (Hatefi 1985; Green and Reed 1998; Starkov 2008). In yeasts, around  
53 750 nuclear encoded proteins must coordinate with those encoded in the mitochondrial  
54 genome (Sickmann et al. 2003). Indeed, a new interdisciplinary field, the “mitonuclear  
55 ecology”, is devoted to the study of the evolutionary consequences due to mitonuclear  
56 conflicts (Hill 2015).

57 In yeasts, recombination in mitochondrial genomes has been mostly focused on  
58 *Saccharomyces cerevisiae* (Dujon et al. 1974; Birky et al. 1982; Taylor 1986; MacAlpine  
59 et al. 1998), the model yeast species in the genus *Saccharomyces* (Hittinger 2013). The  
60 mechanism of mitochondrial genome inheritance is well known in *Saccharomyces* (Ling  
61 et al. 2007; Basse 2010; Ling et al. 2011); but despite the recently mitochondrial genome  
62 characterization of a hundred *S. cerevisiae*, mostly clinical (Wolters et al. 2015), and few  
63 *S. paradoxus*, and the detection of mitochondrial introgression between those two species  
64 (Wu et al. 2015; Wu and Hao 2015), little is known about the genomic properties of most  
65 *Saccharomyces* species.

66 In this study, we inferred the mitochondrial inheritance of 517 *Saccharomyces* strains,  
67 as well as 49 natural interspecific hybrids, isolated from different sources and geographic  
68 origins, by sequencing a mitochondrial gene, *COX2*. This gene has successfully been  
69 used either for phylogenetic purposes (Belloch et al. 2000; Kurtzman and Robnett 2003)  
70 or for the identification of mtDNA inheritance (Peris et al. 2012a; Peris et al. 2012b; Badotti  
71 et al. 2013; Peris et al. 2014; Pérez-Través et al. 2014; Rodríguez et al. 2014). We  
72 extended our work to the downstream gene *ORF1*, an unstudied gene encoding a  
73 putative free-standing homing endonuclease. A homing endonuclease gene (HEG) is a  
74 selfish element described to evolve neutrally, following three steps: i) invasion of an empty  
75 site (HEG<sup>-</sup>) (Colleaux et al. 1986; Burt and Koufopanou 2004), ii) accumulation of  
76 mutations generating premature stop codons or invaded by GC clusters which can disrupt  
77 their coding frame, iii) and a final loss of the gene (Goddard and Burt 1999). We also  
78 sequenced *COX3*, which encodes for cytochrome c oxidase subunit III, to demonstrate

79 the presence of different mitochondrial recombination hotspots in the *COX2-ORF1* region.  
80 We suggest molecular mechanisms that drive such recombinations. In addition, we  
81 propose a reticulate event model in the *Saccharomyces* mitochondrial genome as a  
82 starting hypothesis for future tests, when new complete *Saccharomyces* mitochondrial  
83 genomes will be available.

84

## 85 **Results**

### 86 ***COX2* shows extensive reticulation among *Saccharomyces* species**

87 To understand the mitochondrial inheritance of worldwide distributed wild and  
88 domesticated *Saccharomyces* yeasts (Figure 1), we sequenced and retrieved from public  
89 databases, the mitochondrial *COX2* gene sequences, generating a set of 566  
90 *Saccharomyces* strain sequences (Table S1). *COX2* sequence alignment contained 80  
91 phylogenetically informative positions (see details in Supplementary Text). The *COX2*  
92 phylogenetic tree failed to reconstruct the species tree (Figure S1), likely indicating the  
93 existence of conflicting data in our sequence alignment. A Median-Joining network  
94 showed ten haplogroups, supported by sequence inspection (Figure 2 and S2).  
95 *S. cerevisiae* were found in three haplogroups: C1a, C1b and C2. Three haplogroups  
96 differentiated *S. paradoxus* populations: P1 (Europe), P2 (America B and C) and P3 (Far  
97 East). Two haplogroups for *S. mikatae*: M1 (IFO1815) and M2 (IFO1816). *S. kudriavzevii*  
98 strains were split into K1 (European and Asia A - IFO1802) and K2 (IFO1803). Finally,  
99 one haplogroup for the rest of species: A (*S. arboricola*, CBS10644), E (*S. eubayanus*)  
100 and U (*S. uvarum*).

101 Extensive analysis showed the presence of several recombinant haplotypes among  
102 strains from different species (Figure S2). New recombinations were identified in Far  
103 Eastern *S. paradoxus* (haplotype 64) and *S. cerevisiae* strains (haplotype 2, 60 and 94)  
104 (Figure 2 and S2). We segmented the original *COX2* alignment based on the most  
105 common recombination point (Figure S2) and a Neighbor-Net (NN) phylogenetic network  
106 was reconstructed for each *COX2* segment (Figure S3). The 5' end segment NN  
107 phylonetwork shows a clear differentiation of haplotypes by species with the exception of  
108 haplotypes 69, 70 and 71 belonging to American *S. paradoxus*, which share identical  
109 sequences with some *S. cerevisiae* strains (Figure S3A). Haplotypes from natural hybrids

110 (haplotypes 78, 79, 87, 88, 89 and 93) and *S. eubayanus* (haplotype 102) still appear in  
111 an ambiguous position in the network due to the presence of a different recombination  
112 point (Figure S2). The extensive presence of incongruent data found in the 3' end  
113 segment of *COX2* (Figure S3B) might be also due to recombination.

114 We were able to define the potential donors of several hybrids (*COX2* haplotypes 87,  
115 88, 89), being *S. kudriavzevii* (European or Asian) and a European *S. paradoxus* (Figure  
116 S2). Hybrids *S. cerevisiae* x *S. kudriavzevii* isolated from wine (UvCEG) and a dietary  
117 supplement (IF6), and *S. cerevisiae* x *S. uvarum* isolated from wine (S6U) inherited an  
118 already recombinant mitochondria from *S. cerevisiae* (Figure S2, Table S1). Hybrids  
119 *S. eubayanus* x *S. uvarum* and *S. cerevisiae* x *S. eubayanus* (haplotypes 78, 79, 93) were  
120 also recombinant between *S. eubayanus* and *S. uvarum*.

121 *S. mikatae* IFO1815 and *S. kudriavzevii* IFO1803 haplotypes were also potentially  
122 recombinant (Figure S2). In the case of IFO1803, amino acid sequences indicates a  
123 recombination between *S. kudriavzevii* and *S. uvarum*; although, the *S. uvarum* haplotype  
124 corresponds to an unknown strain. For *S. mikatae* IFO1815, a potential donor might be a  
125 *S. cerevisiae* strain from haplogroup C1b, but its amino acid sequence is similar to  
126 IFO1816.

127

### 128 **All *S. cerevisiae* *COX2* haplogroups are worldwide distributed**

129 The recombination hotspot located in *COX2* makes this gene a good candidate to  
130 differentiate closely related strains. Those strains sharing a similar recombination are  
131 expected to share an ancestor. To describe the phylogeography of *S. cerevisiae*, we  
132 explored the polymorphic *COX2* gene of 418 *S. cerevisiae* from 7 continents, isolated  
133 from both human-associated (baking, beer, clinical, laboratory, fermentation, sake, wine  
134 and traditional alcoholic beverages) and wild environments (Figure 1, Table S1).

135 An association study among *S. cerevisiae* strain origins and their haplogroup  
136 distribution was performed (Figure S4A). Clinical and wine samples were significantly  
137 associated with haplogroup C2 ( $\chi^2$  test p-values  $9.9 \times 10^{-5}$  and  $3 \times 10^{-4}$ , respectively). We  
138 applied a similar approach to infer the distribution of haplogroups taking into account their  
139 geographic origins (Figure S4B), revealing that European *S. cerevisiae* strains were  
140 highly associated with Haplogroup C2 ( $\chi^2$  test p-value  $9.9 \times 10^{-5}$ ). No significant

141 distribution bias was observed in the remaining strains, possibly due to the low number  
142 of wild isolates in our study.

143

## 144 **Two types of the putative homing endonuclease *ORF1* define two *S. cerevisiae*** 145 **Haplogroups**

146 To define the extension of the recombination, we sequenced the *ORF1* region from  
147 36 strains representative of the most frequent *COX2* haplotypes, exploring a total of  
148 seventy-two *ORF1* sequences (Table S1). The presence of *ORF1* gene was confirmed  
149 for the six available *Saccharomyces* species, indicating its broad dissemination across  
150 the genus. *ORF1* length was found to be highly polymorphic among strains and species,  
151 mostly due to differing content of AT-rich tandem repeats and GC clusters (see  
152 Supplementary Text, Figure S5), with lengths ranging from 1.3kbp (ZA17) to 1.5kbp  
153 (VRB).

154 The *ORF1* phylogenetic tree (Figure S5) conflicts with the species tree (Figure S1),  
155 indicating a potential HGT from one species to another or the presence of recombinant  
156 sequences. To visualize the presence of conflicting data in the alignment, we  
157 reconstructed a NN phylogenetic network (Figure 3). Two groups of sequences were  
158 visualized in this network: the Type I group contains most *Saccharomyces ORF1*  
159 sequences, except for sequences of *S. kudriavzevii*. The Type II group is comprised of  
160 *S. cerevisiae* haplotypes from the *COX2* haplogroup C2 and the sequence of the Far  
161 Eastern *S. paradoxus* CECT11152 (M51, syn. IFO1804), isolated from Far East Russia,  
162 which also appeared as having a recombinant *COX2* (Figure S2 and S3). Haplotypes  
163 corresponding to strains of *S. cerevisiae*, some European and Far Eastern *S. paradoxus*,  
164 and *S. kudriavzevii*, as well as some hybrids, were located in an ambiguous position in  
165 the phylonetwork, between the two main *ORF1* groups (Type I and Type II), suggesting  
166 they correspond to recombinant forms.

167 Recombinant analyses, performed with both *RDP* and *GARD* programs, supported the  
168 presence of four partitions. A Kishino-Hasegawa test of phylogenetic congruence  
169 indicated that phylogenetic trees from each partition were incongruent with each other.  
170 The best partition model was 4 partitions ( $\Delta AICc$  143.724), and for each breakpoint the  
171 p-value was below 0.01. However, *RDP* and *GARD* disagreed with the location of the

172 second breakpoint due to the presence of different recombinant points, depending on the  
173 strain (Figure S6 and S7B). Some recombination breakpoints were located close to A+T-  
174 rich sequences or GC clusters (see Supplementary text, Figure 4). One of the  
175 recombination points was just on the beginning of the second LAGLIDADG domain of the  
176 encoded homing endonuclease (Figure 4). At least one of the recombinant events  
177 involved some of the haplotypes located in the ORF1 phylogeny in-between the two main  
178 types (Figure S6 and S7). Further recombinations between Type I x Type I, Type I x Type  
179 II and Type II x Type II were detected (Figure S6 and S7).

180 Data indicates a recent recombination event between *ORF1* from *S. kudriavzevii* and  
181 Far Eastern *S. paradoxus*, supported by the high identity among *S. kudriavzevii* and Far  
182 Eastern *S. paradoxus* (CECT11422 and CECT11424) *ORF1* amino acid sequences for  
183 two segments of the alignment (Figure S6 and S7). For example, the genetic distance for  
184 the second region was: 1.1% (*S.par* FE-*S.kud* IFO1802) and 2.4% (*S. par* FE-*S.kud* EU),  
185 much lower compared to the nuclear genetic differences, 13.66% and 13.55%,  
186 respectively, and when it was compared to the fourth *ORF1* segment (Figure S6 and S7):  
187 46.05% (*S. par* FE-*S.kud* IFO1802) and 47.91% (*S.par* FE-*S.kud* EU).

188 Particular attention must be given to the strains CECT11757 and L1528,  
189 representative of the C2xP3 recombinant COX2 haplogroup. Their COX2 sequence  
190 suggested that their *ORF1* sequence should be closely related to type II; however, their  
191 *ORF1* sequence in fact was related to type I. This result suggests a second recombination  
192 event occurred in L1528, which recombinant *ORF1* contains a type II sequence from the  
193 second to the last segment (Figure S6 and S7). However, the case of CECT11757 *ORF1*  
194 seems more complex. This *ORF1* is a type I closely related to that from European  
195 *S. paradoxus*, which suggests a second recombination event with a European  
196 *S. paradoxus* *ORF1* while maintaining the typical COX2 3' end region of a Far Eastern  
197 *S. paradoxus*. Another scenario might be that COX2 3' end is under a different substitution  
198 rate driving to homoplasy in that region, according to a "patchy-tachy" model (Sun et al.  
199 2011). For this reason we extended the analysis to the *ORF1* region, where most of the  
200 recombinations were well supported by the invasion of *ORF1* or mediated by highly  
201 recombinogenic regions.

203 **COX3 supports a mtDNA transfer from *S. cerevisiae* to American *S. paradoxus***  
204 **strains and HGT/introgression in the *COX2-ORF1* region**

205 To improve the species assignment based on a mitochondrial gene, we sequenced  
206 the *COX3* gene for those strains representative of the most frequent *COX2* haplotypes  
207 (Table S1). The selection of *COX3* for species assignment was based on its lack of introns  
208 or an overlapping homing endonuclease, minimizing a potential recombinant scenario.

209 The *COX3* NJ phylogenetic tree was congruent with the species tree (Figure S1 and  
210 S8), except for American *S. paradoxus*. In addition, the position of *S. mikatae* was not  
211 well resolved. The *COX3* MJ phylogenetic network assigned species by haplogroups  
212 (Figure 5). We could not define the *S. eubayanus* haplogroup because its *COX3*  
213 sequence was not available. We found a high number of nucleotide substitutions in the  
214 *S. cerevisiae* *COX3* sequences retrieved from *Saccharomyces* Genome Resequencing  
215 Project (SGRP) (H4, H9-11), indicative of assembling errors in these mitochondrial  
216 genomes; nevertheless, the topologies of the MJ network and the NJ tree were not  
217 affected.

218 The CECT11152 *COX3* sequence was located within *S. paradoxus* haplogroup. This  
219 result confirms an HGT event involving the 3' end *COX2* and *ORF1* region (Figure S3B),  
220 but not affecting the rest of the mitochondrial genome (Figure S8). A similar conclusion is  
221 reached for *S. cerevisiae* x *S. kudriavzevii* hybrids (CECT1102, CECT11011,  
222 CECT1990), where most of the mitochondrial genome is from *S. kudriavzevii*. The two  
223 representative strains from the *COX2* haplogroup C2 (L1528 and CECT11757) possess  
224 an *ORF1* closely related to the European *S. paradoxus* CECT10380 but have a *S.*  
225 *cerevisiae* *COX3* sequence type, supporting another HGT for the *COX2-ORF1* region  
226 (Figure 5 and S8).

227 Our two representatives from the American *S. paradoxus*, 120MX and CBS5313,  
228 displaying an identical 5' end *COX2* segment sequence to *S. cerevisiae* sequences  
229 (Figure S2A), also had a *COX3* sequence closely related to the *S. cerevisiae* haplogroup.  
230 The *COX3* haplotype 17 of 120MX was identical to *S. cerevisiae* *COX3* sequences  
231 (Figure 5 and S8). This result suggests that the American *S. paradoxus* likely inherited a  
232 mitochondrial genome from *S. cerevisiae*.

233



## 234 Discussion

### 235 Recombinations in the *COX2-ORF1* region might be mediated by *ORF1*, GC clusters 236 and/or AT tandem repeats.

237 Evidence of intraspecific mitochondrial recombination among *S. cerevisiae* strains has  
238 been shown (Dujon et al. 1974; Nunnari et al. 1997; Berger and Yaffe 2000). Indeed, a  
239 complete DNA recombination map in *S. cerevisiae* has been recently drawn (Fritsch et  
240 al. 2014). Mitochondrial recombination is initiated by a double-strand break (DSB)  
241 generated and resolved by mainly four nuclear encoded proteins (Lockshon et al. 1995;  
242 Ling and Shibata 2002; Ling et al. 2007; Ling et al. 2013) and it can be facilitated by the  
243 mitochondrial genome architecture, presence of GC clusters, or by the mobility of  
244 mitochondrial elements, such as introns or homing endonucleases (Dieckmann and  
245 Gandy 1987; Séraphin et al. 1987; Yang et al. 1998). We found that two *COX2*  
246 *S. cerevisiae* and *S. paradoxus* groups of sequences are mainly driven by the presence  
247 of two highly divergent *ORF1* gene sequences, type I and type II. The presence of two  
248 clear *COX2* groups might be the result of the *ORF1* invasion.

249 A recent study, where fourteen *S. cerevisiae* and *S. paradoxus* mitochondrial  
250 genomes were sequenced, found HGTs between those two species mainly facilitated by  
251 GC clusters (Wu et al. 2015; Wu and Hao 2015). Our results showed recombination  
252 breakpoints close to GC clusters and AT tandem repeats in wild *Saccharomyces* strains,  
253 supporting that these genomic elements are facilitating mitochondrial recombination  
254 events. All these three elements, GC clusters, AT tandem repeats and homing  
255 endonucleases might be responsible of facilitating recombination in mitochondria.

256 The clearest example of *ORF1* transfer was between Far Eastern *S. paradoxus*  
257 CECT11152 and *S. cerevisiae*, which is in agreement to the described HGT of GC cluster  
258 GC48 between *S. cerevisiae* and IFO1804 (CECT11152) (Wu and Hao 2015), suggesting  
259 that both transfers likely occurred at the same time. For this reason, we propose that  
260 *ORF1* is a likely functional homing endonuclease similar to other *S. cerevisiae* free-  
261 standing homing endonucleases, such as *ORF3* (*ENS2*) (Séraphin et al. 1987; Nakagawa  
262 et al. 1992). Following nomenclature rules (Belfort and Roberts 1997), we suggest  
263 renaming *ORF1* to F-Scell $\alpha$  or F-Scell $\beta$  for *S. cerevisiae* and replacing the last two  
264 letters with the corresponding first two letters for each species *ORF1*, where “F” stands

265 for freestanding homing endonuclease, “S” for *Saccharomyces*, “ce” for *cerevisiae* and III  
266 because F-Scel and F-Scell are designated for Endo.Scel (*ENS2*, *ORF3*) and HO endo,  
267 respectively. The type I and type II group membership is designated by using a suffix  $\alpha$   
268 and  $\beta$ , respectively.

269

### 270 **Wine *S. cerevisiae* domestication bottleneck fixed a mitochondrial variant**

271 Wild *Saccharomyces* yeasts reproduce mainly by mitotic divisions (Tsai et al. 2008;  
272 Liti et al. 2009); however, some industrial strains have been shown to be hybrids  
273 (Lopandic et al. 2007; González et al. 2008; Sipiczki 2008; Dunn and Sherlock 2008;  
274 Peris et al. 2012c; Pérez-Través et al. 2014) or experienced some degree of sexual  
275 mating with closely related or fairly distant species, as it is supported by the presence of  
276 nuclear genome introgressions (Liti et al. 2006; Novo et al. 2009; Dunn et al. 2012;  
277 Almeida et al. 2014). The result of hybridization and HGT in industrial conditions can be  
278 adaptive (Belloch et al. 2008; Gibson et al. 2013). Most of these studies have been  
279 focused in the nuclear genome, but little is known about the mitochondrial genotype of  
280 wild and industrial strains.

281 The low mutation rate of yeast’s mitochondrial coding sequences (Clark-Walker 1991)  
282 and assembling method improvements are turning the attention to the mitochondria,  
283 which have been recently used to estimate time divergence among  
284 *Schizosaccharomyces pombe* strains (Jeffares et al. 2015), and to infer the population  
285 structure of 100 *S. cerevisiae* (Wolters et al. 2015). Although the presence of  
286 recombinations or the utilization of highly polymorphic sequences is not well suited for  
287 time divergence estimation, mitochondrial sequence is useful for tracing evolutionary  
288 relationships between closely related strains (Bartelli et al. 2013; Wolters et al. 2015).

289 Two independent *S. cerevisiae* domestication events from wild isolates have been  
290 inferred (Legras et al. 2007), one for sake and another for wine strains (Fay and  
291 Benavides 2005; Liti et al. 2009; Schacherer et al. 2009). Indeed, *S. cerevisiae* wine  
292 domestication is attributed to be originated in the Near East (Fay and Benavides 2005;  
293 Liti et al. 2009) probably from the wild *S. cerevisiae* stock from the Asian continent (Wang  
294 et al. 2012). The high frequency of European wine strains with haplogroup C2 suggests  
295 that the bottleneck during the domestication to winemaking fixed few *COX2* variants from

296 haplogroup C2. At the nuclear level, similar results were observed for the wine/European  
297 strains (Liti et al. 2009; Schacherer et al. 2009). Most clinical samples are derived from  
298 wine isolates, as the mitochondrial haplogroup indicate, in agreement with previous  
299 results of the 100 *S. cerevisiae* project (Strope et al. 2015; Wolters et al. 2015). With the  
300 expansion of domesticated wine *S. cerevisiae* strains together with vineyards throughout  
301 Europe by Phoenicians and Romans, and the migration to America after European  
302 colonization, these wine *S. cerevisiae* *ORF1* sequences were able to recombine with  
303 other *S. cerevisiae* *ORF1* sequences. Wild and wine *S. cerevisiae* crosses might have  
304 been possible, as wine isolates have been found in oak trees close to vineyards (Hyma  
305 and Fay 2013). It is also clear how in the case of the dietary supplement and wine hybrids  
306 *S. cerevisiae* x *S. kudriavzevii* (IF6 and UvCEG) and a winemaking hybrid *S. cerevisiae*  
307 x *S. uvarum* (S6U) inherited a recombinant mitochondria from *S. cerevisiae* strains mostly  
308 associated with wine from Europe, South America and Africa. Before hybridization of *S.*  
309 *cerevisiae* with other *Saccharomyces* species to generate the IF6/UvCEG and S6U  
310 hybrids, *S. cerevisiae* was introgressed with Far Eastern *S. paradoxus*, likely before  
311 migrating to Europe (Figure 6). Introgressions occurring before hybridization might be  
312 also a potential scenario for some other hybrids, such as *S. cerevisiae* x *S. kudriavzevii*  
313 hybrids which showed introgressions from European *S. paradoxus* (Peris et al. 2012a) or  
314 introgressions from European *S. uvarum* into mitochondria of *S. cerevisiae* x *S.*  
315 *eubayanus* hybrids (Peris et al. 2014).

316 The impact of the haplogroup C2 on the winemaking process is of interest to  
317 understand the domestication of *S. cerevisiae*. Interestingly, most of our hybrids have  
318 inherited a non-*cerevisiae* mitochondrial genome (Peris et al. 2012a; Peris et al. 2012b;  
319 Peris et al. 2014; Pérez-Través et al. 2014). Previous work (Warren *et al.* 2013) has  
320 demonstrated how the inheritance of one of the parental mitochondrial genomes impacts  
321 respiration in hybrids, highlighting the importance of taking into account the fixation of the  
322 mtDNA during the generation of artificial hybrids for specific industrial processes.

323

### 324 **Introgressions might influence diversification**

325 All potential transfers detected in our study are summarized in Figure 6 which is a  
326 starting point to model mitochondrial introgressions in *Saccharomyces* genus. Some

327 particular *Saccharomyces* lineages have some degree of introgression, such as *S.*  
328 *kudriavzevii* Asia B, *S. kudriavzevii* Asia A and European and *S. mikatae* IFO1815.

329 The clearest and most interesting introgression was detected in all American *S.*  
330 *paradoxus* from populations B and C. These strains have a COX2 sequence with a closely  
331 related 5' end to *S. cerevisiae* from haplogroup C1, and the two selected representative  
332 strains (120MX and CBS5313) shared a COX3 sequence with *S. cerevisiae* strains.  
333 Recent evidence of phylogenetic tree incongruence among *S. cerevisiae* and American  
334 population B *S. paradoxus* YPS138 (Leducq et al. 2014) strain was also detected (Wu et  
335 al. 2015), supporting our hypothesis. Our results indicate that the American *S. paradoxus*  
336 has inherited the mtDNA from *S. cerevisiae*. Indeed, a recent study has described a  
337 *S. cerevisiae* from an unknown source with a mitochondrial genome closely related to  
338 *S. paradoxus* CBS432 (Wolters et al. 2015), which supports the hypothesis that wild  
339 strains can survive with foreign mitochondrial genomes. The increase of new isolates  
340 resulting from the improvement of isolation methods (Sampaio and Gonçalves 2008;  
341 Sylvester et al. 2015), along with the application of new methods for assembling  
342 mitochondrial genome will shed light about other American *S. paradoxus* mitochondrial  
343 inheritance and the extension of mitochondrial introgressions among other species. The  
344 presence of a foreign mitochondrial genome brings the question is mitochondrial  
345 introgression has an influence in the diversification of species. We have previously shown  
346 how hybrid *S. cerevisiae* x *S. kudriavzevii* strains inheriting a mitochondrial genome from  
347 *S. cerevisiae* are more prone to lose *S. kudriavzevii* genes (Peris et al. 2012c) suggesting  
348 an evolutionary constriction due to the proper coordination of nuclear genes with  
349 mitochondrial genes. Nonetheless, most of Bateson-Dobzhansky-Muller incompatibilities  
350 are between nuclear and mitochondrial genes (Lee et al. 2008; Chou et al. 2010; Hou et  
351 al. 2015). In this way, the accommodation of nuclear genome to this new mitochondrial  
352 genome might drive the diversification of American *S. paradoxus* from the other *S.*  
353 *paradoxus* lineages.

354

355 **Mitochondrial introgressions as evidence of ancestral hybridization events in wild**  
356 **environments**

357 *Saccharomyces* double and triple hybrids have been isolated from many different  
358 industrial conditions, such as “ale” and lager beer, wine, cider, dietary supplements  
359 (Casaregola et al. 2001; Barros Lopes et al. 2002; González et al. 2008; Peris et al.  
360 2012a; Pérez-Través et al. 2014) and clinical samples (Peris et al. 2012a). However,  
361 hybrids have not been isolated from natural samples, suggesting that hybridization is only  
362 occurring in artificial conditions where hybrids are better adapted to those stressful  
363 environments (Belloch et al. 2008) by the acquisition of beneficial traits from the parents  
364 (Peris et al. 2012c; Gibson et al. 2013). HGT between *S. cerevisiae* and *S. paradoxus*  
365 may be mediated by the formation of heterokaryons due to pseudohyphae formation of  
366 *Saccharomyces* strains found in sympatric association (Wu et al. 2015), such as *S.*  
367 *cerevisiae*, *S. paradoxus* and *S. kudriavzevii* in Europe (Sampaio and Gonçalves 2008).  
368 However, we cannot rule-out a complete hybridization with a rapid loss of one of the  
369 parent genomes by outcrossings with the non-hybridized sibling strains. The diversity of  
370 *S. cerevisiae* x *S. kudriavzevii* hybrids (Peris et al. 2012a), most of them with lower  
371 *S. kudriavzevii* genome content, suggests a rapid loss of *S. kudriavzevii* genes after  
372 hybridization while keeping traits important for low temperature fermentations (Peris et al.  
373 2012c). In addition, several introgressions involving most *Saccharomyces* species  
374 suggest some gene flow among them (Liti et al. 2005; Muller and McCusker 2009;  
375 Almeida et al. 2014) that supports hybridization events in natural environments. Our study  
376 suggests that Asia is a hotspot of these hybridization events and that hybridization might  
377 be influenced by the presence of all *Saccharomyces* species, as the Asian origin model  
378 suggests (Bing et al. 2014; Liti 2015).

379

## 380 **Material and Methods**

### 381 ***Saccharomyces* strains and culture media**

382 A collection of 517 *Saccharomyces* strains and 49 natural hybrids, worldwide  
383 distributed (Figure 1, Table S1), were used in this study. Species assignment for each  
384 strain was delimited by different authors using molecular techniques, such as the  
385 sequencing of 5.8S-ITS region, Random Fragment Length Polymorphisms (RFLP), a  
386 multilocus sequence approach or whole genome sequencing (Table S1). Hybrids were  
387 mostly characterized on the basis of restriction analysis of 35 different nuclear genes

388 (González et al. 2008; Peris et al. 2012a; Peris et al. 2012b; Pérez-Través et al. 2014).  
389 *Naumovozyma castellii* sequences were included as outgroup references to root  
390 phylogenetic trees. Yeast strains were grown at 28 °C in YPD (2% glucose, 2% peptone  
391 and 1% yeast extract).

392

### 393 **PCR amplification, sequencing and gene alignments**

394 Total yeast DNA was extracted following the procedure described by Querol *et al.*  
395 (1992). Partial gene sequence (585bp) of the mitochondrial gene *COX2* was amplified by  
396 PCR using the primers described in Belloch *et al.* (2000). *COX3* and *ORF1* gene  
397 sequences were amplified and sequenced, using primers described in Table S2, for  
398 seventy-two *Saccharomyces* strains, representatives of the most frequent *COX2*  
399 haplotypes (Table S1). For the sequencing of *ORF1* we followed a primer walking  
400 approach (Figure 4). *ORF1* gene amplification from IFO1815 failed to be amplified, and  
401 the reference *S. eubayanus* strain yHCT76 was not available in the period of this study.  
402 Sequences were deposited in GenBank under Accession nos. JN676363-JN676823 and  
403 JN709044-JN709115. Gene sequence accession numbers from previously sequenced  
404 strains are shown in Table S1. Sequences from *S. cerevisiae* strains from the  
405 *Saccharomyces* Genome Resequencing Project (SGRP) were retrieve using the blast  
406 server ([http://www.sanger.ac.uk/cgi-bin/blast/submitblast/s\\_cerevisiae\\_sgrp](http://www.sanger.ac.uk/cgi-bin/blast/submitblast/s_cerevisiae_sgrp)). A PSI-  
407 Blast search was run to retrieve *ORF1* sequences from the closest sequences of non-  
408 *Saccharomyces* species.

409 *COX2* and *COX3* sequences were aligned using CLUSTALW, as implemented in MEGA  
410 v5 (Tamura et al. 2011), and manually trimmed. For *ORF1* we used MUSCLE (Edgar 2004)  
411 to align the aminoacid sequences and the nucleotide sequence alignment was further  
412 refined by visual inspection in Jalview 4.0b2 (Waterhouse et al. 2009).

413

### 414 ***COX2*, *ORF1* and *COX3* haplotype classification, and *COX2* genetic diversity**

415 DnaSP v5 (Librado and Rozas 2009) was used to calculate the number of haplotypes  
416 of *COX2*, *ORF1* and *COX3* and genetic statistics of *COX2*, such as the number of  
417 polymorphic sites(s), average number of differences between sequences ( $k$ ), nucleotide  
418 diversity ( $\pi$ ) and haplotype diversity ( $H_d$ ) based on the species designation.

419

## 420 **Phylogenetic analysis and detection of recombination**

421 *COX2*, *ORF1* and *COX3* phylogenetic trees reconstructed using the Neighbor-Joining  
422 (NJ) methods was performed in MEGA v5 (Tamura et al. 2011), performing 10000  
423 pseudoreplicates bootstrapping for branch support. *COX2* and *COX3* median joining  
424 networks were reconstructed using PopART v1.7.2b (<http://popart.otago.ac.nz>). *COX2*  
425 and *ORF1* Neighbor-Net phylogenetic networks were also reconstructed using  
426 SplitsTree v4 (Huson and Bryant 2006) to explore the presence of incongruence in  
427 our dataset.

428 An alignment with representative sequences of each *COX2* haplotype was used as  
429 an input for RDPv3.44 (Martin et al. 2010) to detect and define recombination points.  
430 Recombination points detected by two or more methods implemented in RDPv3.44 were  
431 considered significant, applying a Bonferroni correction for multiple comparisons.  
432 Although, different recombination points were detected, we defined two *COX2* segments  
433 using the most frequent recombinant sites. *COX2* gene was divided into two segments  
434 referred as 5'-end (positions 1-496 in the alignment [124-620 in the reference *COX2* gene  
435 sequence from the S288c strain, SGD ID: S000007281]) and 3'-end (from 497-end of  
436 alignment [621-708 in the reference *COX2* sequence]). The Maximum Likelihood  
437 phylogenetic trees for both *COX2* segments was reconstructed with the best fitted  
438 models, inferred using jModeltest (Posada 2008). Tree Puzzle v5.2 (Schmidt et  
439 al. 2002) was used to test the phylogenetic congruence of the two inferred phylogenetic  
440 trees to the species *Saccharomyces* phylogenetic tree topology (Borneman and Pretorius  
441 2015). The statistical significance of these comparisons was performed by the  
442 Shimodaira-Hasegawa (Shimodaira and Hasegawa 1999) and ELW (Expected-  
443 Likelihood Weights) (Strimmer and Rambaut 2002) tests.

444 A concatenated alignment of *COX2* position 621 to the end and the partial *ORF1*  
445 sequences was generated. Indels, mostly due to AT repetitive regions, and GC clusters  
446 were removed. For the detection of recombinant sites we followed the approach  
447 described above. Four segments were described for the most frequent recombinant  
448 points. First segment (224bp) takes the *COX2* region and the 246 nucleotide positions of  
449 *ORF1* (corresponding to nucleotide 292 in the S288c *ORF1* gene, SGD ID: S000007282).

450 The last *COX2* nineteen nucleotides are the first *ORF1* nucleotides, both CDS are  
451 overlapped. The second segment takes 247 to 644 position of *ORF1* (from 203-704 in  
452 S288c *ORF1*), the third was built from 64 to 920 (706-980 in S288c), and the forth from  
453 921 to the end of the alignment (981-1435 in S288c). Recombinant segments were also  
454 supported by the GARD (Genetic Algorithm Recombination Detection) method  
455 implemented in *Datamonkey* (Delport et al. 2010), which also perform a Kishino-  
456 Hasegawa test (Kishino and Hasegawa 1989).

457 The species tree was reconstructed by using a concatenated alignment of *RIP1*,  
458 *MET2* and *FUN14*, generated with *FASCONCAT* v1.0 (Kück and Meusemann 2010). Gene  
459 sequences were retrieved from Genbank, blast searches against SGRP *S. cerevisiae*  
460 sequences and *S. arboricola* online blast database  
461 (<http://www.moseslab.csb.utoronto.ca/sarb/blast/>), or blast searches to local databases  
462 generated with the *Saccharomyces Sensu Stricto* (SSS) genomes  
463 ([http://www.saccharomycessensustricto.org/cgi-bin/s3.cgi?data=Assemblies&version](http://www.saccharomycessensustricto.org/cgi-bin/s3.cgi?data=Assemblies&version=current)  
464 [=current](http://www.saccharomycessensustricto.org/cgi-bin/s3.cgi?data=Assemblies&version=current)). A Maximum-Likelihood (ML) phylogenetic tree was inferred using *RAxML* v8  
465 (Stamatakis 2014) by performing 100 heuristic searches for the best gene tree, which  
466 branches were bootstrap supported by 1000 pseudosamples.

467

## 468 **Statistical analysis**

469  $\chi^2$  test for detecting bias distributions of *S. cerevisiae* strains by country or isolation  
470 source among the *COX2* haplogroups was performed in R statistical package (Adler and  
471 Murdoch D 2009). p-values were replicated 10000 times by a Monte Carlo simulation.

472



## 473 **Acknowledgments**

474 We thank to C.P. Kurtzman to provide us the *S. mikatae* NRRL Y-27342. We thank  
475 Chris Todd Hittinger and William G. Alexander for critical comments on the manuscript.  
476 This work was supported by Spanish Government grant (AGL2009-12673-C02-02) and  
477 Generalitat Valenciana grants (PROMETEUS and ACOMP/2012) to EB, and from the  
478 Spanish Government FEDER (AGL2012-39937-C02-01) and Generalitat Valenciana  
479 (PROMETEOII/2014/042) to AQ. DP acknowledges to the Spanish Government for its  
480 Ministerio de Ciencia e Innovacion (MICINN) FPI fellowship. AA received PROMEP  
481 Fellowship from SEP, Mexican government. LP acknowledges to CSIC and the Spanish  
482 Ministry of Education and Science (MEC) for an I3P fellowship. SO acknowledges to MEC  
483 for the postdoctoral research contract.

484

## 485 **References**

- 486 Adler D, Murdoch D. 2009. rgl: 3D visualization device system (Open GL).
- 487 Albertin W, da Silva T, Rigoulet M, Salin B, Masneuf-Pomarede I, *et al.* 2013. The  
488 mitochondrial genome impacts respiration but not fermentation in interspecific  
489 *Saccharomyces* hybrids. PLoS ONE. 8:e75121
- 490 Almeida P, Gonçalves C, Teixeira S, Libkind D, Bontrager M *et al.* 2014. A Gondwanan  
491 imprint on global diversity and domestication of wine and cider yeast *Saccharomyces*  
492 *uvarum*. Nat Commun. 5:
- 493 Andersson JO. 2009. Gene transfer and diversification of microbial Eukaryotes. Annu Rev  
494 Microbiol. 63:177-193.
- 495 Badotti F, Vilaça ST, Arias A, Rosa CA, Barrio E. 2013. Two interbreeding populations of  
496 *Saccharomyces cerevisiae* strains coexist in cachaça fermentations from Brazil. FEMS  
497 Yeast Res. 14:289-301.
- 498 Barros Lopes M, Bellon JR, Shirley NJ, Ganter PF. 2002. Evidence for multiple  
499 interspecific hybridization in *Saccharomyces sensu stricto* species. FEMS Yeast Res.  
500 1:323-331.

501 Bartelli TF, Ferreira RC, Colombo AL, Briones MRS. 2013. Intraspecific comparative  
502 genomics of *Candida albicans* mitochondria reveals non-coding regions under neutral  
503 evolution. *Infection, Genetics and Evolution*. 14:302-312.

504 Basse CW. 2010. Mitochondrial inheritance in fungi. *Curr Opin Microbiol*. 13:712-719.

505 Belfort M, Roberts RJ. 1997. Homing endonucleases: keeping the house in order. *Nucl*  
506 *Acids Res*. 25:3379-3388.

507 Belloch C, Querol A, Garcia MD, Barrio E. 2000. Phylogeny of the genus *Kluyveromyces*  
508 inferred from the mitochondrial cytochrome-c oxidase II gene. *Int J Syst Evol Microbiol*.  
509 50:405-416.

510 Belloch C, Orlic S, Barrio E, Querol A. 2008. Fermentative stress adaptation of hybrids  
511 within the *Saccharomyces sensu stricto* complex. *Int J Food Microbiol*. 122:188-195.

512 Berger KH, Yaffe MP. 2000. Mitochondrial DNA inheritance in *Saccharomyces cerevisiae*.  
513 *Trends Microbiol*. 8:508-513.

514 Bing J, Han PJ, Liu WQ, Wang QM, Bai FY. 2014. Evidence for a Far East Asian origin  
515 of lager beer yeast. *Curr Biol*. 24:R380-R381.

516 Birky CW. 2001. The inheritance of genes in mitochondria and chloroplasts: Laws,  
517 Mechanisms, and Models. *Annu Rev Genet*. 35:125-148.

518 Birky CW, Arlene RA, Rosemary D, Maureen C. 1982. Mitochondrial transmission  
519 genetics: replication, recombination, and segregation of mitochondrial DNA and its  
520 inheritance in crosses. *Mitochondrial Genes*. Cold Spring Harbor Monograph Archive.

521 Borneman AR, Pretorius IS. 2015. Genomic insights into the *Saccharomyces sensu*  
522 *stricto* complex. *Genetics*. 199:281-291.

523 Burt A, Koufopanou V. 2004. Homing endonuclease genes: the rise and fall and rise again  
524 of a selfish element. *Curr Opin Genet Dev*. 14:609-615.

525 Casaregola S, Nguyen HV, Lapathitis G, Kotyk A, Gaillardin C. 2001. Analysis of the  
526 constitution of the beer yeast genome by PCR, sequencing and subtelomeric sequence  
527 hybridization. *Int J Syst Evol Microbiol*. 51:1607-1618.

528 Chou JY, Hung YS, Lin KH, Lee HY, Leu JY. 2010. Multiple molecular mechanisms cause  
529 reproductive isolation between three yeast species. *PLoS Biol*. 8:e1000432

530 Clark-Walker GD. 1991. Contrasting mutation rates in mitochondrial and nuclear genes  
531 of yeasts versus mammals. *Curr Genet*. 20:195-198.

- 532 Colleaux L, d'Auriol L, Betermier M, Cottarel G, Jacquier A, Galibert F, Dujon B. 1986.  
533 Universal code equivalent of a yeast mitochondrial intron reading frame is expressed into  
534 *E. coli* as a specific double strand endonuclease. *44*:521-533.
- 535 Delpont W, Poon AFY, Frost SDW, Kosakovsky Pond SL. 2010. Datamonkey 2010: a  
536 suite of phylogenetic analysis tools for evolutionary biology. *Bioinformatics*. *26*:2455-  
537 2457.
- 538 Dieckmann C, Gandy B. 1987. Preferential recombination between GC clusters in yeast  
539 mitochondrial DNA. *EMBO J*. *6*:4197-4203.
- 540 Dujon B, Slonimski PP, Weill L. 1974. Mitochondrial genetics IX: A model for  
541 recombination and segregation of mitochondrial genomes in *Saccharomyces cerevisiae*.  
542 *Genetics*. *78*:415-437.
- 543 Dunn B, Richter C, Kvitek DJ, Pugh T, Sherlock G. 2012. Analysis of the *Saccharomyces*  
544 *cerevisiae* pan-genome reveals a pool of copy number variants distributed in diverse  
545 yeast strains from differing industrial environments. *Genome Res*. *22*:908-924.
- 546 Dunn B, Sherlock G. 2008. Reconstruction of the genome origins and evolution of the  
547 hybrid lager yeast *Saccharomyces pastorianus*. *Genome Res*. *18*:1610-1623.
- 548 Edgar RC. 2004. MUSCLE: multiple sequence alignment with high accuracy and high  
549 throughput. *Nucl Acids Res*. *32*:1792-1797.
- 550 Fay JC, Benavides JA. 2005. Evidence for domesticated and wild populations of  
551 *Saccharomyces cerevisiae*. *PLoS Genet*. *1*:e5
- 552 Fritsch ES, Chabbert CD, Klaus B, Steinmetz LM. 2014. A genome-wide map of  
553 mitochondrial DNA recombination in yeast. *Genetics*. *198*:755-771.
- 554 Gibson BR, Storgårds E, Krogerus K, Vidgren V. 2013. Comparative physiology and  
555 fermentation performance of Saaz and Froberg lager yeast strains and the parental  
556 species *Saccharomyces eubayanus*. *Yeast*. *30*:255-266.
- 557 Goddard MR, Burt A. 1999. Recurrent invasion and extinction of a selfish gene. *PNAS*.  
558 *96*:13880-13885.
- 559 González SS, Barrio E, Querol A. 2008. Molecular characterization of new natural hybrids  
560 between *S. cerevisiae* and *S. kudriavzevii* from brewing. *Appl Environ Microbiol*. *74*:2314-  
561 2320.
- 562 Green DR, Reed JC. 1998. Mitochondria and Apoptosis. *Science*. *281*:1309-1312.

563 Hao W, Richardson AO, Zheng Y, Palmer JD. 2010. Gorgeous mosaic of mitochondrial  
564 genes created by horizontal transfer and gene conversion. Proc Natl Acad Sci U S A.  
565 107:21576-21581.

566 Hatefi Y. 1985. The mitochondrial electron transport and oxidative phosphorylation  
567 system. Annu Rev Biochem. 54:1015-1069.

568 Hill GE. 2015. Mitonuclear ecology. Mol Biol Evol.

569 Hittinger CT. 2013. *Saccharomyces* diversity and evolution: a budding model genus.  
570 29:309-317.

571 Hou J, Friedrich A, Gounot JS, Schacherer J. 2015. Comprehensive survey of condition-  
572 specific reproductive isolation reveals genetic incompatibility in yeast. Nat Commun. 6:

573 Huson DH, Bryant D. 2006. Application of phylogenetic networks in evolutionary studies.  
574 Mol Biol Evol. 23:254-267.

575 Hyma KE, Fay JC. 2013. Mixing of vineyard and oak-tree ecotypes of *Saccharomyces*  
576 *cerevisiae* in North American vineyards. Mol Ecol. 22:2917-2930.

577 Jeffares DC, Rallis C, Rieux A *et al.* 2015. The genomic and phenotypic diversity of  
578 *Schizosaccharomyces pombe*. Nat Genet. 47:235-241.

579 Keeling P. 2009. Role of Horizontal Gene Transfer in the evolution of photosynthetic  
580 Eukaryotes and their plastids. In: Gogarten M, Gogarten J, Olendzenski L, editors.  
581 Horizontal Gene Transfer. Humana Press. p. 501-515.

582 Kishino H, Hasegawa M. 1989. Evaluation of the maximum likelihood estimate of the  
583 evolutionary tree topologies from DNA sequence data, and the branching order in  
584 hominoidea. J Mol Evol. 29:170-179.

585 Kück P, Meusemann K. 2010. FASconCAT, Version 1.0. Zool. Forschungsmuseum A.  
586 Koenig, Germany.

587 Kurtzman CP, Robnett CJ. 2003. Phylogenetic relationships among yeasts of the  
588 '*Saccharomyces* complex' determined from multigene sequence analyses. FEMS Yeast  
589 Res. 3:417-432.

590 Leducq JB, Charron G, Samani P *et al.* 2014. Local climatic adaptation in a widespread  
591 microorganism. Proc R Soc Lond B Biol Sci. 281:

- 592 Lee HY, Chou JY, Cheong L, Chang NH, Yang SY, Leu JY. 2008. Incompatibility of  
593 nuclear and mitochondrial genomes causes hybrid sterility between two yeast species.  
594 135:1065-1073.
- 595 Legras JL, Merdinoglu D, Cornuet JM, Karst F. 2007. Bread, beer and wine:  
596 *Saccharomyces cerevisiae* diversity reflects human history. Mol Ecol. 16:2091-2102.
- 597 Librado P, Rozas J. 2009. DnaSP v5: a software for comprehensive analysis of DNA  
598 polymorphism data. Bioinformatics. 25:1451-1452.
- 599 Ling F, Hori A, Shibata T. 2007. DNA recombination-initiation plays a role in the extremely  
600 biased inheritance of yeast [rho-] mitochondrial DNA that contains the replication origin  
601 ori5. Mol Cell Biol. 27:1133-1145.
- 602 Ling F, Hori A, Yoshitani A, Niu R, Yoshida M, Shibata T. 2013. Din7 and Mhr1 expression  
603 levels regulate double-strand-break-induced replication and recombination of mtDNA at  
604 ori5 in yeast. Nucl Acids Res. 41:5799-5816.
- 605 Ling F, Mikawa T, Shibata T. 2011. Enlightenment of yeast mitochondrial homoplasmy:  
606 diversified roles of gene conversion. Genes. 2:169-190.
- 607 Ling F, Shibata T. 2002. Recombination-dependent mtDNA partitioning: in vivo role of  
608 Mhr1p to promote pairing of homologous DNA. EMBO J. 21:4730-4740.
- 609 Liti G. 2015. The fascinating and secret wild life of the budding yeast *S. cerevisiae*. eLife  
610 Sciences. 4:
- 611 Liti G, Barton DB, Louis EJ. 2006. Sequence diversity, reproductive isolation and species  
612 concepts in *Saccharomyces*. Genetics. 174:839-850.
- 613 Liti G, Carter DM, Moses AM *et al.* 2009. Population genomics of domestic and wild  
614 yeasts. Nature. 458:337-341.
- 615 Liti G, Peruffo A, James SA, Roberts IN, Louis EJ. 2005. Inferences of evolutionary  
616 relationships from a population survey of LTR-retrotransposons and telomeric-associated  
617 sequences in the *Saccharomyces sensu stricto* complex. Yeast. 22:177-192.
- 618 Lockshon D, Zweifel SG, Freeman-Cook LL, Lorimer HE, Brewer BJ, Fangman WL. 1995.  
619 A role for recombination junctions in the segregation of mitochondrial DNA in yeast. Cell.  
620 81:947-955.
- 621 Lopandic K, Wallner E, Tscheik G, Leitner G, Querol A, Borth N, Tiefenbrunner W. 2007.  
622 Genetically different wine yeasts isolated from Austrian vine-growing regions influence

623 wine aroma differently and contain putative hybrids between *Saccharomyces cerevisiae*  
624 and *Saccharomyces kudriavzevii*. FEMS Yeast Res. 7:953-965.

625 MacAlpine DM, Perlman PS, Butow RA. 1998. The high mobility group protein Abf2p  
626 influences the level of yeast mitochondrial DNA recombination intermediates in vivo. Proc  
627 Natl Acad Sci U S A. 95:6739-6743.

628 Martin DP, Lemey P, Lott M, Moulton V, Posada D, Lefevre P. 2010. RDP3: a flexible  
629 and fast computer program for analyzing recombination. Bioinformatics. 26:2462-2463.

630 Muller LAH, McCusker JH. 2009. A multispecies-based taxonomic microarray reveals  
631 interspecies hybridization and introgression in *Saccharomyces cerevisiae*. FEMS Yeast  
632 Res. 9:143-152.

633 Nakagawa K, Morishima N, Shibata T. 1992. An endonuclease with multiple cutting sites,  
634 Endo.Scl, initiates genetic recombination at its cutting site in yeast mitochondria. EMBO  
635 J. 11:2707-2715.

636 Novo M, Bigey F, Beyne E *et al.* 2009. Eukaryote-to-eukaryote gene transfer events  
637 revealed by the genome sequence of the wine yeast *Saccharomyces cerevisiae* EC1118.  
638 Proc Natl Acad Sci U S A. 106:16333-16338.

639 Nunnari J, Marshall WF, Straight A, Murray A, Sedat JW, Walter P. 1997. Mitochondrial  
640 transmission during mating in *Saccharomyces cerevisiae* is determined by mitochondrial  
641 fusion and fission and the intramitochondrial segregation of mitochondrial DNA. Mol Biol  
642 Cell. 8:1233-1242.

643 Pérez-Través L, Lopes CA, Querol A, Barrio E. 2014. On the complexity of the  
644 *Saccharomyces bayanus* taxon: hybridization and potential hybrid speciation. PLoS ONE.  
645 9:e93729

646 Peris D, Belloch C, Lopandic K, Álvarez-Pérez JM, Querol A, Barrio E. 2012a. The  
647 molecular characterization of new types of *S. cerevisiae* x *S. kudriavzevii* hybrid yeasts  
648 unveils a high genetic diversity. Yeast. 29:81-91.

649 Peris D, Lopes CA, Arias A, Barrio E. 2012b. Reconstruction of the evolutionary history  
650 of *Saccharomyces cerevisiae* x *S. kudriavzevii* hybrids based on multilocus sequence  
651 analysis. PLoS ONE. 7:e45527

652 Peris D, Lopes CA, Belloch C, Querol A, Barrio E. 2012c. Comparative genomics among  
653 *Saccharomyces cerevisiae* x *Saccharomyces kudriavzevii* natural hybrid strains isolated  
654 from wine and beer reveals different origins. BMC Genomics. 13:407

655 Peris D, Sylvester K, Libkind D, Gonçalves P, Sampaio JP, Alexander WG, Hittinger CT.  
656 2014. Population structure and reticulate evolution of *Saccharomyces eubayanus* and its  
657 lager-brewing hybrids. Mol Ecol. 23:2031-2045.

658 Posada D. 2008. jModelTest: phylogenetic model averaging. Mol Biol Evol. 25:1253-  
659 1256.

660 Querol A, Barrio E, Huerta T, Ramon D. 1992. Molecular monitoring of wine fermentations  
661 conducted by active dry yeast strains. Appl Environ Microbiol. 58:2948-2953.

662 Rodríguez ME, Pérez-Través L, Sangorrín MP, Barrio E, Lopes CA. 2014.  
663 *Saccharomyces eubayanus* and *Saccharomyces uvarum* associated with the  
664 fermentation of *Araucaria araucana* seeds in Patagonia. FEMS Yeast Res. n/a-n/a.

665 Sampaio JP, Gonçalves P. 2008. Natural populations of *Saccharomyces kudriavzevii* in  
666 Portugal are associated with oak bark and are sympatric with *S. cerevisiae* and *S.*  
667 *paradoxus*. Appl Environ Microbiol. 74:2144-2152.

668 Schacherer J, Shapiro JA, Ruderfer DM, Kruglyak L. 2009. Comprehensive  
669 polymorphism survey elucidates population structure of *Saccharomyces cerevisiae*.  
670 Nature. 458:342-345.

671 Schmidt HA, Strimmer K, Vingron M, von Haeseler A. 2002. TREE-PUZZLE: maximum  
672 likelihood phylogenetic analysis using quartets and parallel computing. Bioinformatics.  
673 18:502-504.

674 Séraphin B, Simon M, Faye G. 1987. The mitochondrial reading frame RF3 is a functional  
675 gene in *Saccharomyces uvarum*. J Biol Chem. 262:10146-10153.

676 Shimodaira H, Hasegawa M. 1999. Multiple comparisons of Log-Likelihoods with  
677 applications to Phylogenetic inference. Mol Biol Evol. 16:1114-1116.

678 Sickmann A, Reinders J, Wagner Y *et al.* 2003. The proteome of *Saccharomyces*  
679 *cerevisiae* mitochondria. Proc Natl Acad Sci U S A. 100:13207-13212.

680 Sipiczki M. 2008. Interspecies hybridization and recombination in *Saccharomyces* wine  
681 yeasts. FEMS Yeast Res. 8:996-1007.

- 682 Stamatakis A. 2014. RAxML version 8: a tool for phylogenetic analysis and post-analysis  
683 of large phylogenies. *Bioinformatics*. 30:1312-1313.
- 684 Starkov AA. 2008. The role of mitochondria in reactive oxygen species metabolism and  
685 signaling. *Annals of the New York Academy of Sciences*. 1147:37-52.
- 686 Strimmer K, Rambaut A. 2002. Inferring confidence sets of possibly misspecified gene  
687 trees. *Proceedings Biological sciences / The Royal Society*. 269:137-142.
- 688 Strope PK, Skelly DA, Kozmin SG, Mahadevan G, Stone EA, Magwene PM, Dietrich FS,  
689 McCusker JH. 2015. The 100-genomes strains, an *S. cerevisiae* resource that illuminates  
690 its natural phenotypic and genotypic variation and emergence as an opportunistic  
691 pathogen. *Genome Res*.
- 692 Sun S, Evans BJ, Golding GB. 2011. "Patchy-Tachy" leads to false positives for  
693 recombination. *Mol Biol Evol*. 28:2549-2559.
- 694 Sylvester K, Wang QM, James B, Mendez R, Hulfachor AB, Hittinger CT. 2015.  
695 Temperature and host preferences drive the diversification of *Saccharomyces* and other  
696 yeasts: a survey and the discovery of eight new yeast species. *FEMS Yeast Res*.
- 697 Tamura K, Peterson D, Peterson N, Stecher G, Nei M, Kumar S. 2011. MEGA5: Molecular  
698 Evolutionary Genetics Analysis using Maximum Likelihood, evolutionary distance, and  
699 Maximum Parsimony methods. *Mol Biol Evol*. 28:2731-2739.
- 700 Taylor JW. 1986. Fungal evolutionary biology and mitochondrial DNA. *Exp Mycol*. 10:259-  
701 269.
- 702 Tsai IJ, Bensasson D, Burt A, Koufopanou V. 2008. Population genomics of the wild yeast  
703 *Saccharomyces paradoxus*: quantifying the life cycle. *Proc Natl Acad Sci U S A*.  
704 105:4957-4962.
- 705 Wang QM, Liu WQ, Liti G, Wang SA, Bai FY. 2012. Surprisingly diverged populations of  
706 *Saccharomyces cerevisiae* in natural environments remote from human activity. *Mol Ecol*.  
707 21:5404-5417.
- 708 Waterhouse AM, Procter JB, Martin DMA, Clamp M, Barton GJ. 2009. Jalview Version 2-  
709 -a multiple sequence alignment editor and analysis workbench. *Bioinformatics*. 25:1189-  
710 1191.
- 711 Wolters JF, Chiu K, Fiumera HL. 2015. Population structure of mitochondrial genomes in  
712 *Saccharomyces cerevisiae*. *BMC Genomics*. 16:451



713 Wu B, Buljic A, Hao W. 2015. Extensive horizontal transfer and homologous  
714 recombination generate highly chimeric mitochondrial genomes in yeast. *Mol Biol Evol.*  
715 Wu B, Hao W. 2015. A dynamic mobile DNA family in the yeast mitochondrial genome.  
716 *G3: Genes|Genomes|Genetics.*  
717 Yang J, Mohr G, Perlman PS, Lambowitz AM. 1998. Group II intron mobility in yeast  
718 mitochondria: target DNA-primed reverse transcription activity of ai1 and reverse splicing  
719 into DNA transposition sites in vitro1. *J Mol Biol.* 282:505-523.

720

## 721 **Figure Legends**

722 **Figure 1. *Saccharomyces* worldwide distribution map.** *Saccharomyces* strains were  
723 colored according to the species designation or the hybrid character (Table S1). Highly  
724 sampled regions were zoom in, for better resolution.

725 **Figure 2. *COX2* Median-Joining phylogenetic network.** A hundred and ten *COX2*  
726 haplotypes (Table S1) were represented by circles. Circles sizes are scaled according to  
727 the haplotype frequency. Pie charts show the frequency of each species in that particular  
728 haplotype. Number of mutations from one haplotype to another are indicated by lines in  
729 the edges connecting haplotypes.

730 **Figure 3. *ORF1* Neighbor-Net phylonetwork.** The phylonetwork differentiated two  
731 groups of *ORF1* sequences, type I and type II. Haplotypes for *ORF1* are represented with  
732 M[number] according to Table S1. Haplotype numbers are colored according to the  
733 species having them. Scale is given in nucleotide substitution per site.

734 **Figure 4. *COX2-ORF1* mitochondrial region scheme.** A representation of the region  
735 *COX2-ORF1* was shown. Homing endonuclease domains were indicated by empty  
736 arrows. Primer names and their targets are shown by arrows. Compatible primers are  
737 indicated by showing identical arrow types. Location of GC clusters and AT tandem  
738 repeats are drawn. Strains and haplotypes containing GC clusters and AT tandem  
739 repeats are indicated in Table S3, Figure S5 and S9. *COX2* and *ORF1* coding sequences  
740 are overlapped and represented by the grey region.

741 **Figure 5. *COX3* Median-Joining phylogenetic network.** Thirty-four *COX3* haplotypes  
742 (Table S1) were represented by circles. Circles sizes are scaled according to the number  
743 of sequences in a haplotype. Pie charts show the frequency of each species in that

744 particular haplotype. Asterisks indicate haplotype sequences with nucleotide errors.  
745 Number of mutations from one haplotype to another are indicated by lines in the edges  
746 connecting haplotypes.

747 **Figure 6. A summary model of potential *COX2-ORF1* introgression in wild**  
748 **environments and during domestication.** A starting model of potential introgressions  
749 in *Saccharomyces* is described. Black, light blue, orange, green, dark blue, pink, red and  
750 purple yeasts represent the yeast ancestors, *S. cerevisiae*, *S. paradoxus*, *S. mikatae*,  
751 *S. kudriavzevii*, *S. arboricola*, *S. uvarum* and *S. eubayanus* yeasts, respectively. Small  
752 circles inside yeasts represent the mtDNA, which is colored according to the species  
753 designation. A *S. paradoxus* yeast with a blue small circle indicates an inheritance of  
754 mtDNA from *S. cerevisiae*. Red, green or red/green boxes represent type I, type II or  
755 recombinant *ORF1* sequences, respectively. A question tag indicates dubious scenario,  
756 unknown *ORF1* or unknown mtDNA sequence due to the absence of *COX3* sequence to  
757 support the mtDNA inheritance.

758

759 **Tables and Figures**

760

761 **Figure 1**

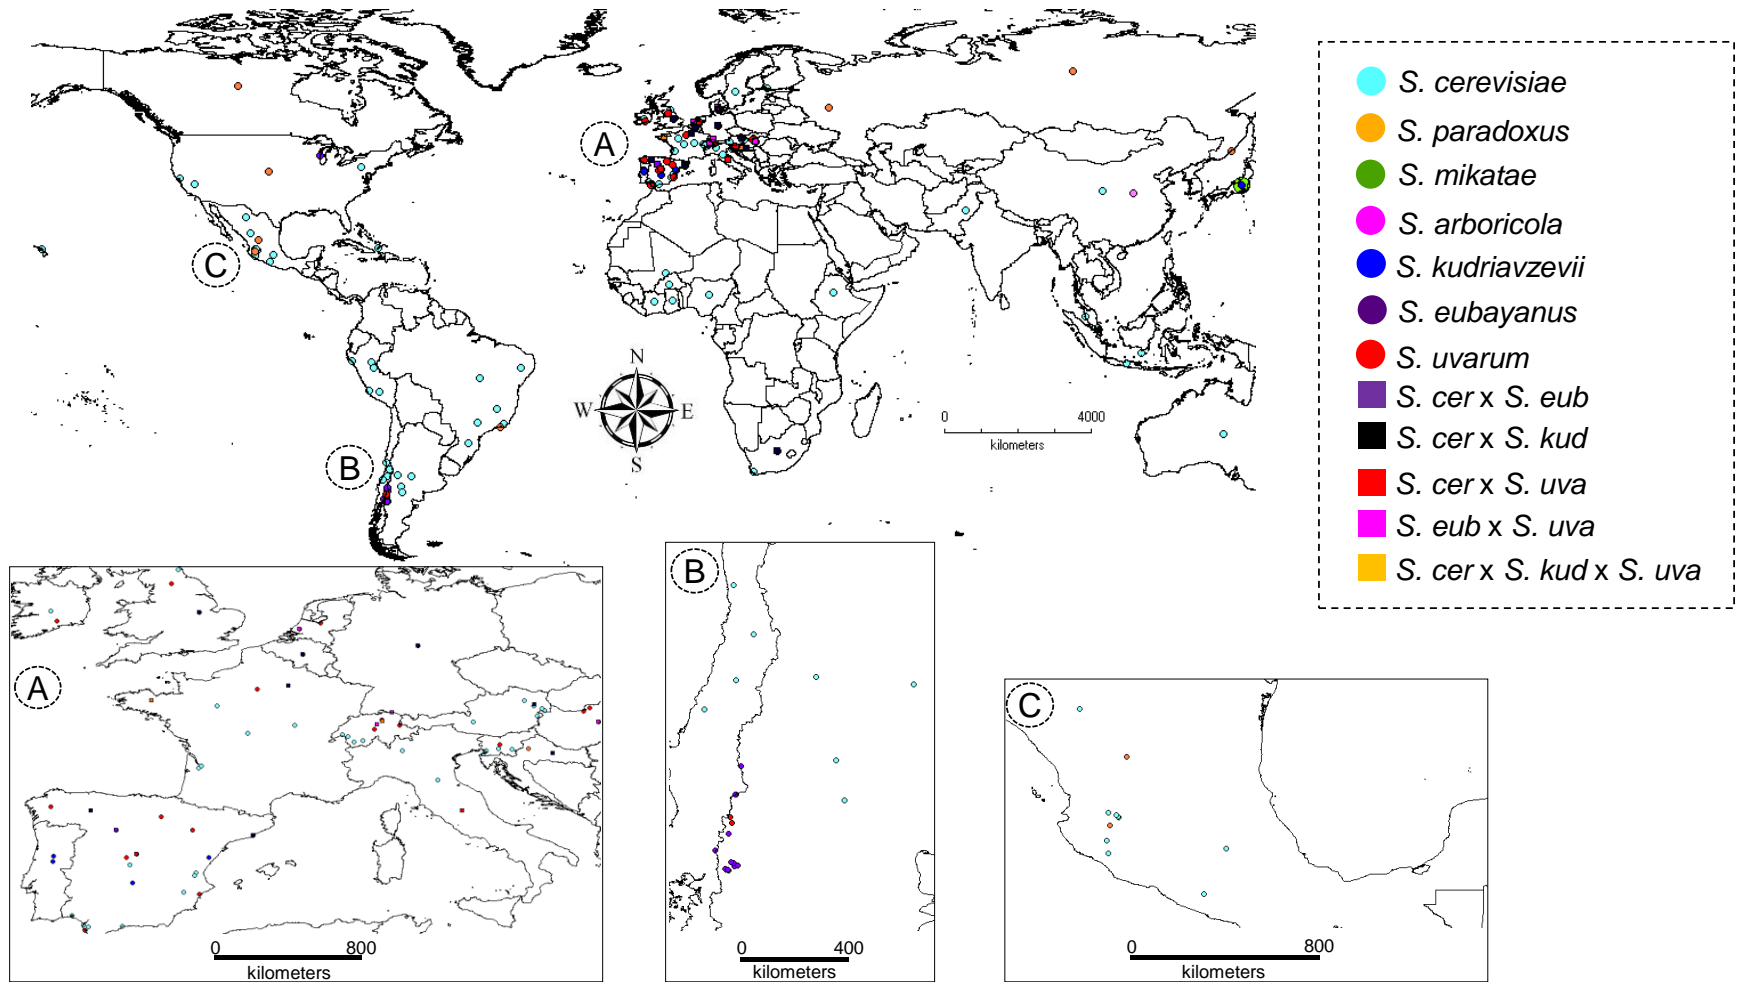

762

763

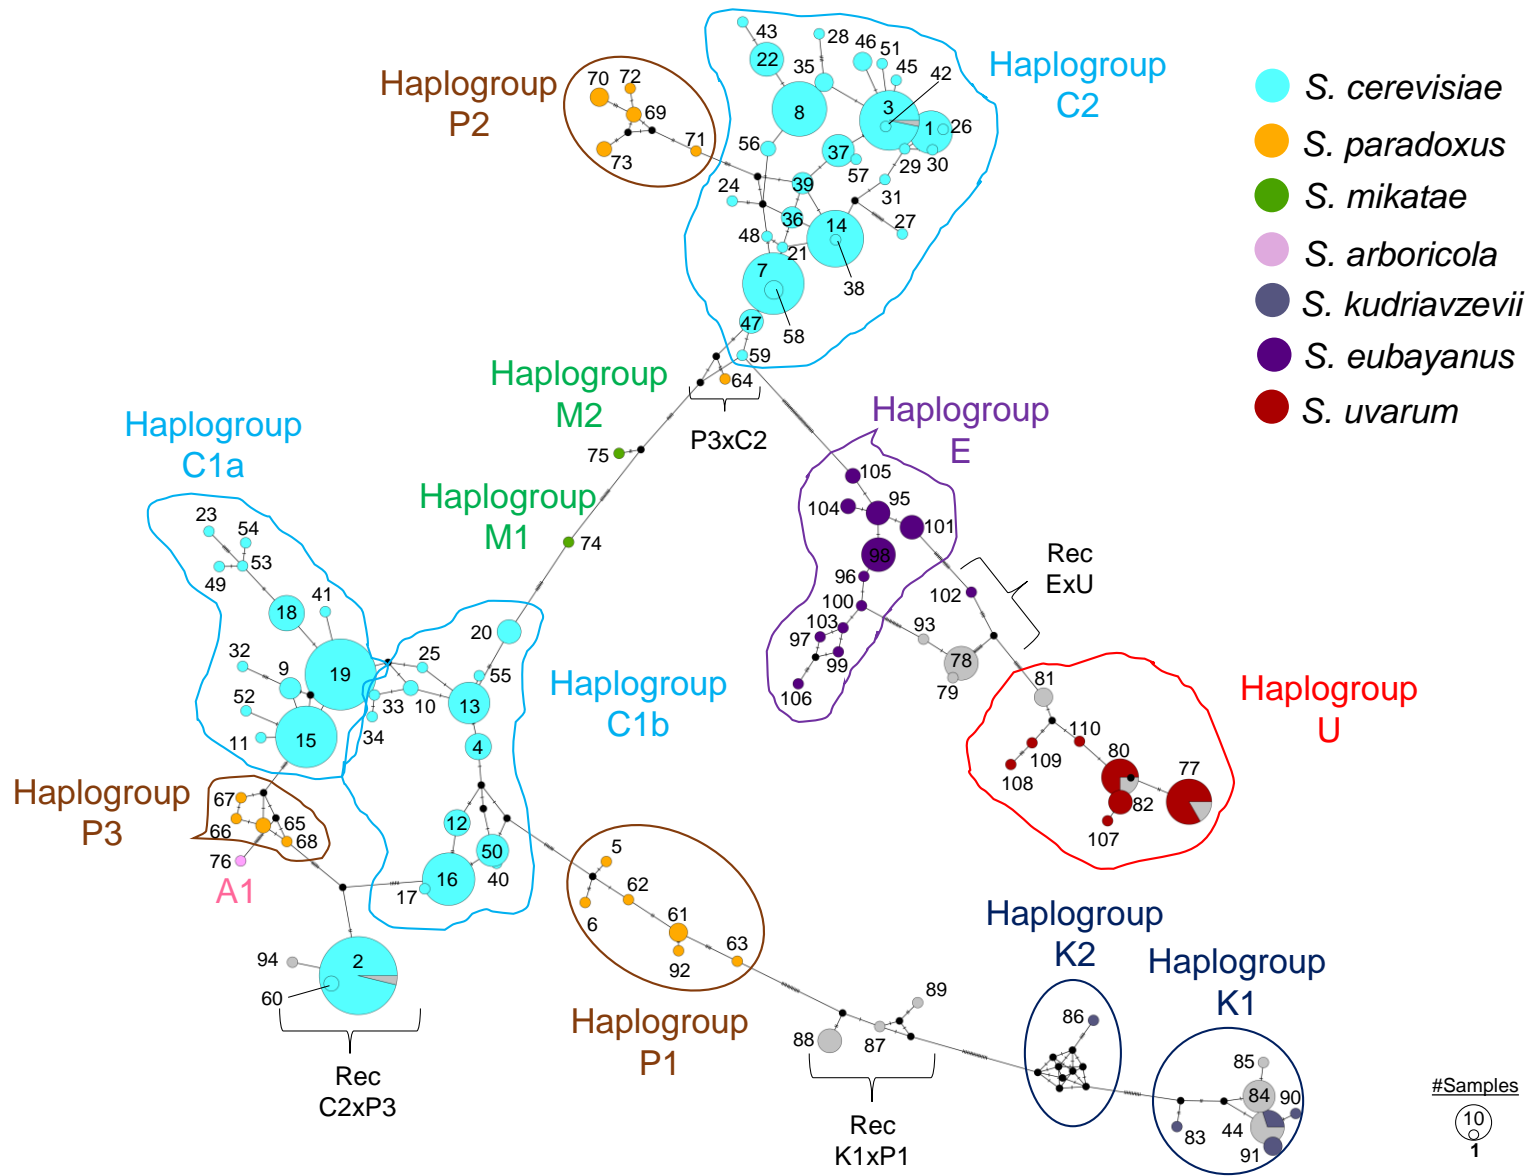

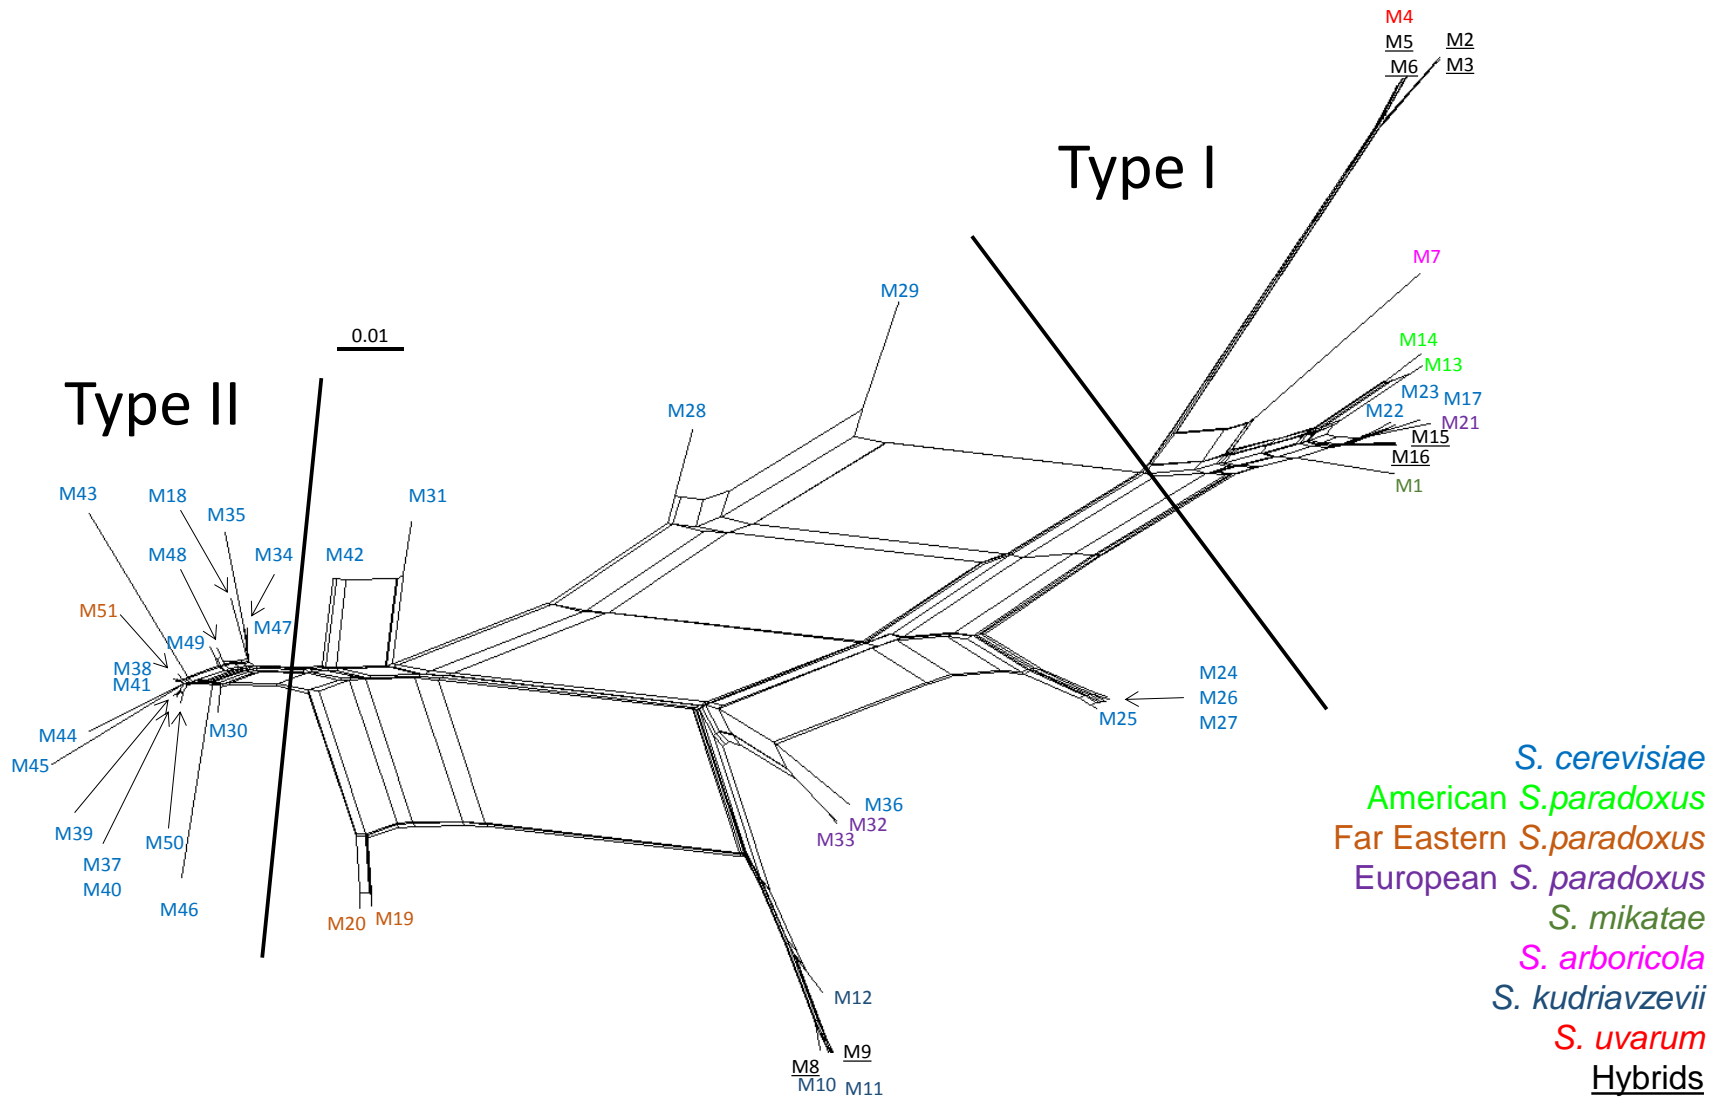

769 **Figure 4**

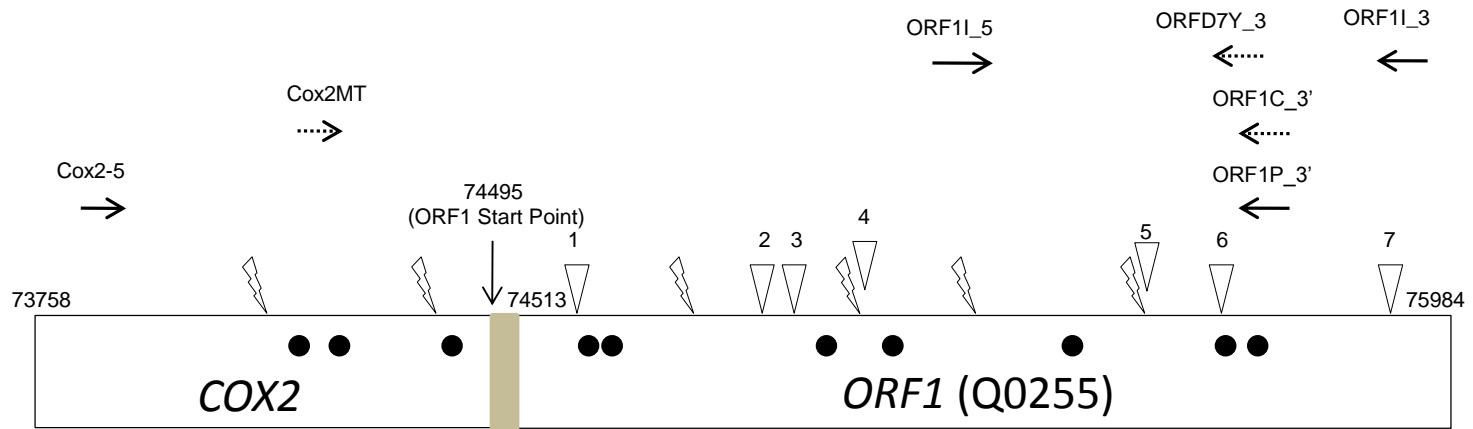

-  GC Cluster Insertion
-  Recombination point
-  A+T Tandem repeats

770

771

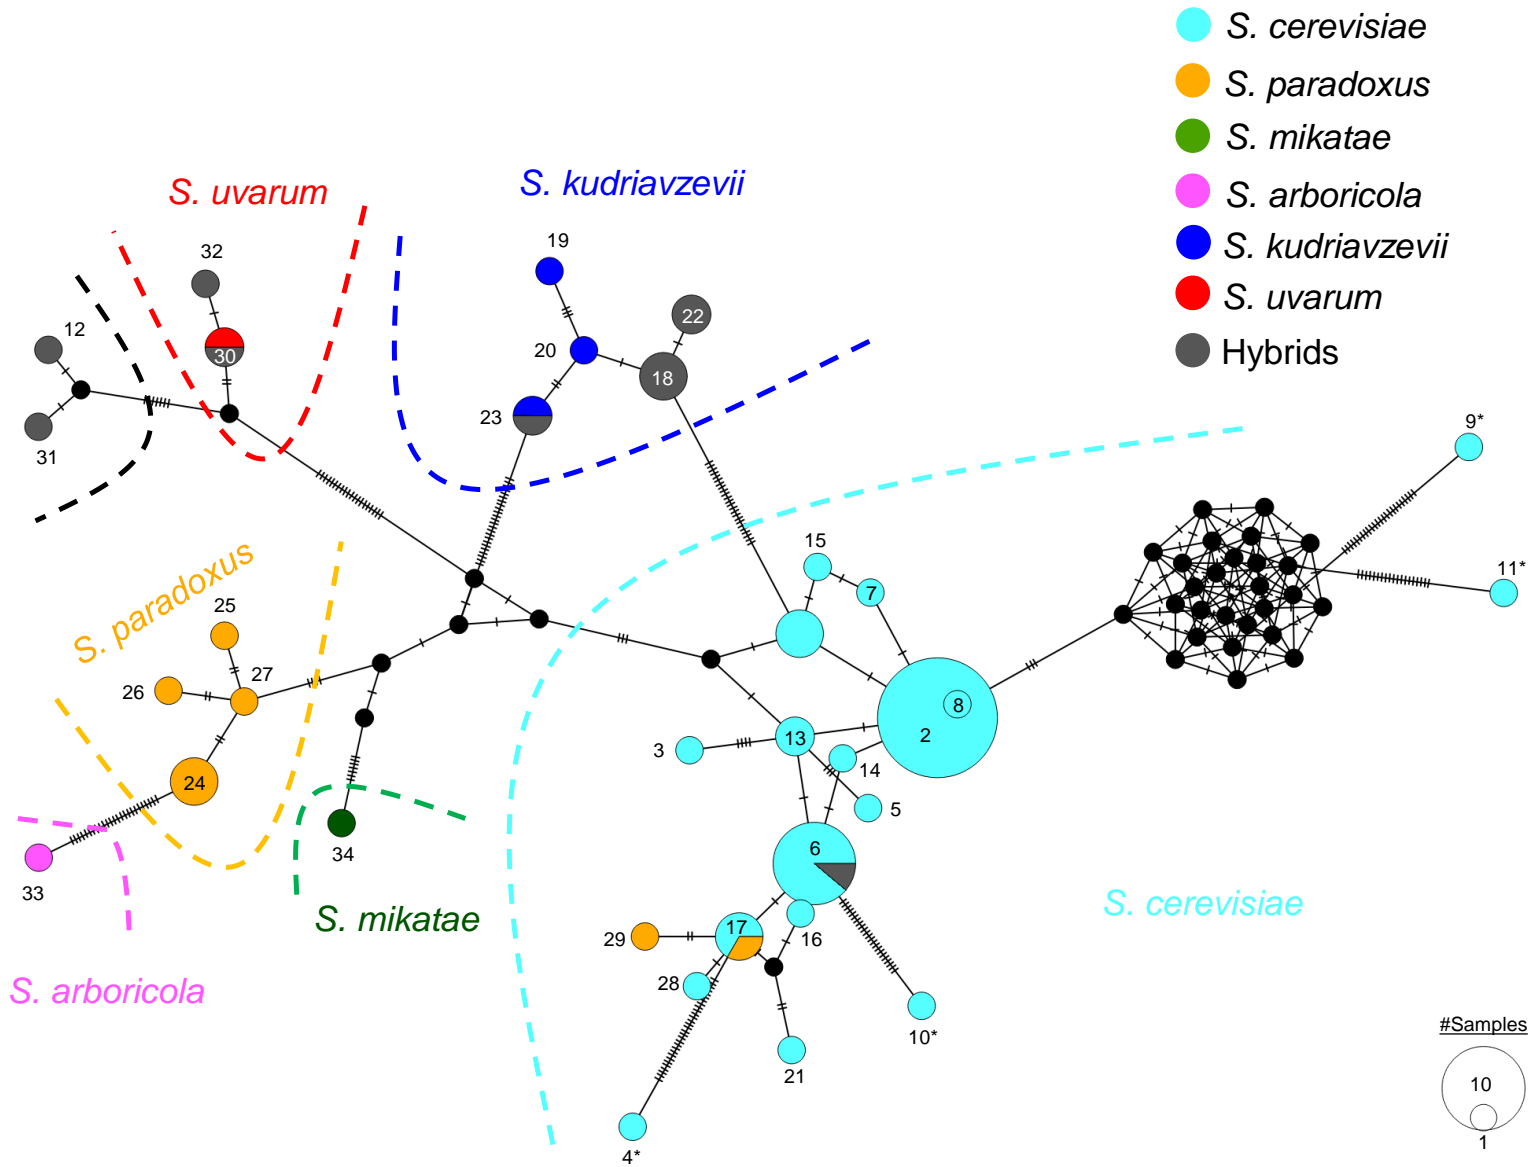

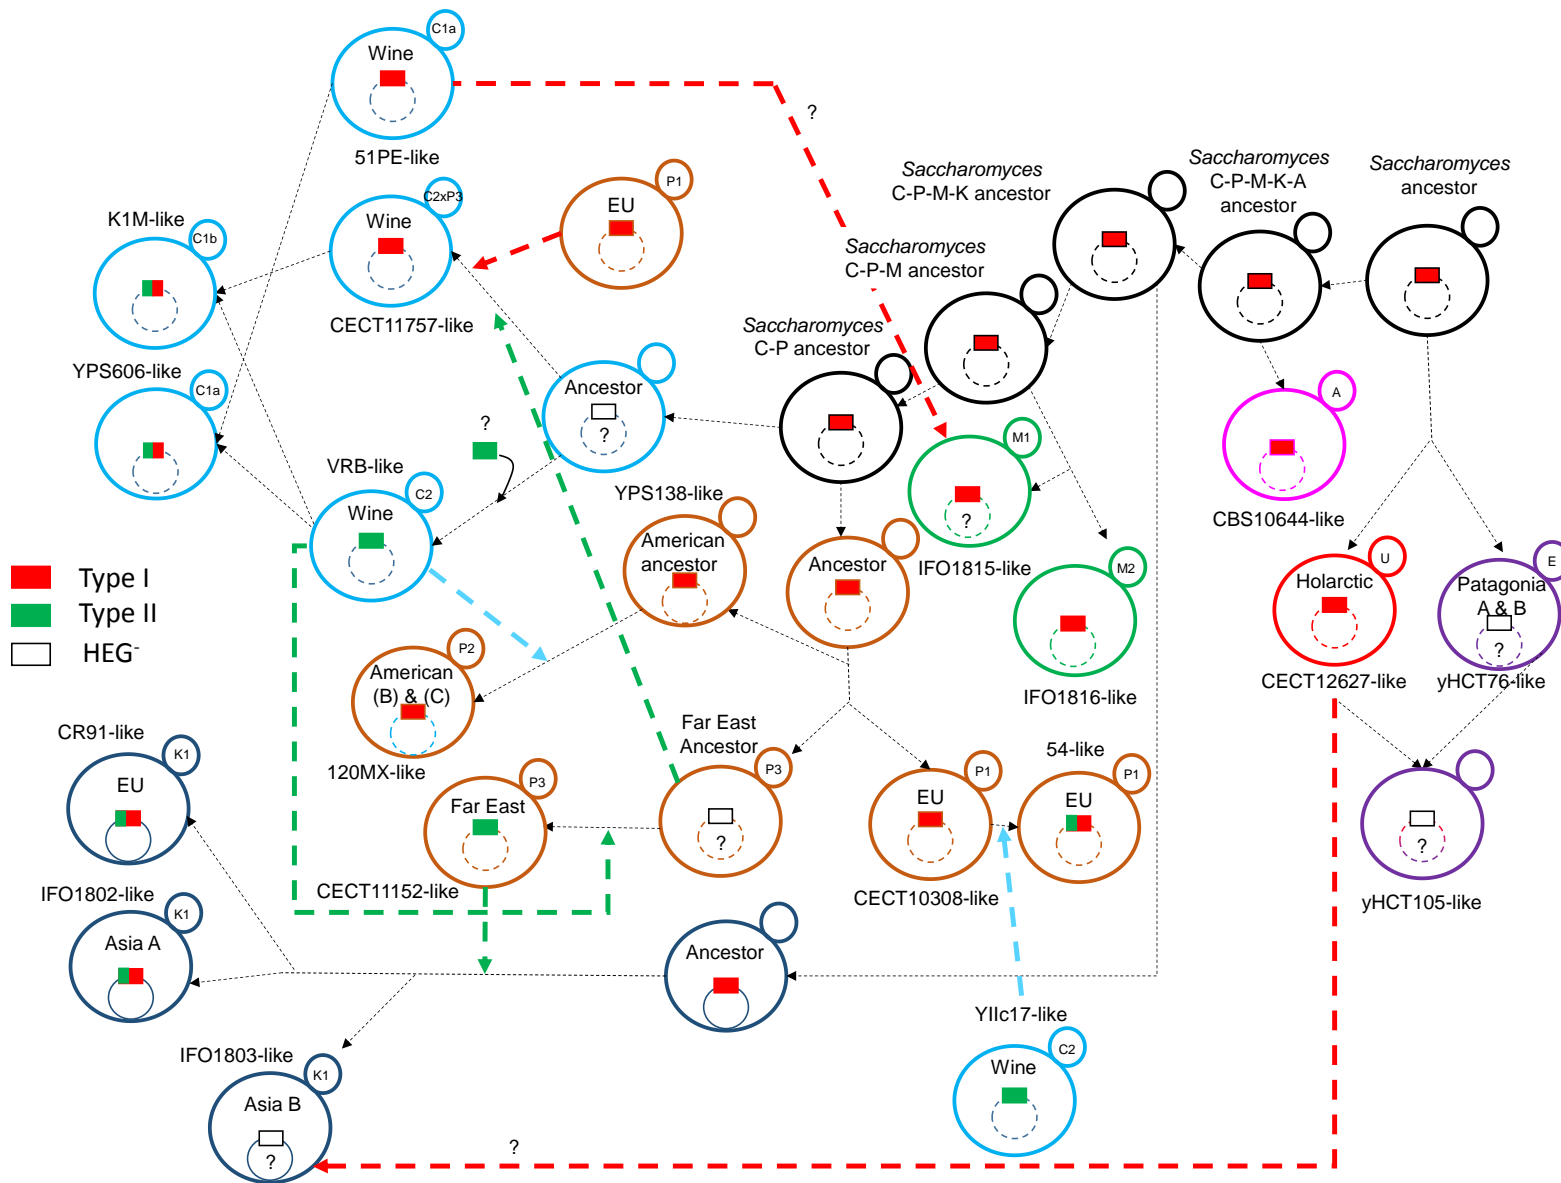

Source: http://www.biorxiv.org/content/10.1101/028324v2.full.pdf
